# Supplementary material for: Electrochemical sensor for the non-enzymatic reduction of hydrogen peroxide and oxidation of gallic acid using a polyamidoblack-10B (PAB)-modified electrode
Source: Royal Society of Chemistry journal article supplement (doi:10.1039/d1nj03869a), 2022-01-01
Supplement: d1nj03869a1.pdf [file d1nj03869a1.pdf]

## **Supplementary Information**

### **Electrochemical sensor for non-enzymatic reduction of hydrogen peroxide and oxidation of gallic acid using PolyAmidoBlack-10B (PAB) modified electrode**

**J. Jayadevimanoranjitham, S. Sriman Narayanan\***

Department of Analytical Chemistry, School of Chemical Sciences, University of Madras,  
Guindy Campus, Chennai – 600 025, Tamil Nadu, India.

\*Corresponding author

Prof. S. Sriman Narayanan,  
UGC BSR Faculty,  
Department of Analytical Chemistry,  
School of Chemical Science,  
University of Madras, Guindy Campus,  
Chennai-600025  
E-mail- [sriman55@yahoo.com](mailto:sriman55@yahoo.com)  
Phone: +91-44-22202719, Fax: +91-44-22352494

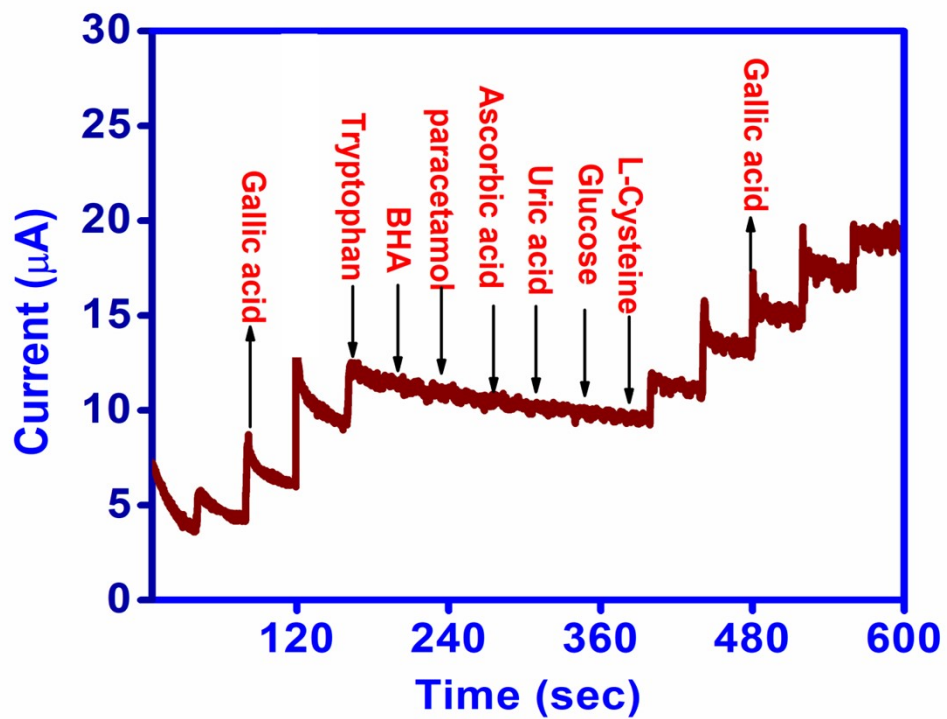

**Fig.S1.** Chronoamperometric response of GA with various interferences such as Tryptophan, uric acid, glucose, BHA, ascorbic acid, paracetamol, L-Cysteine

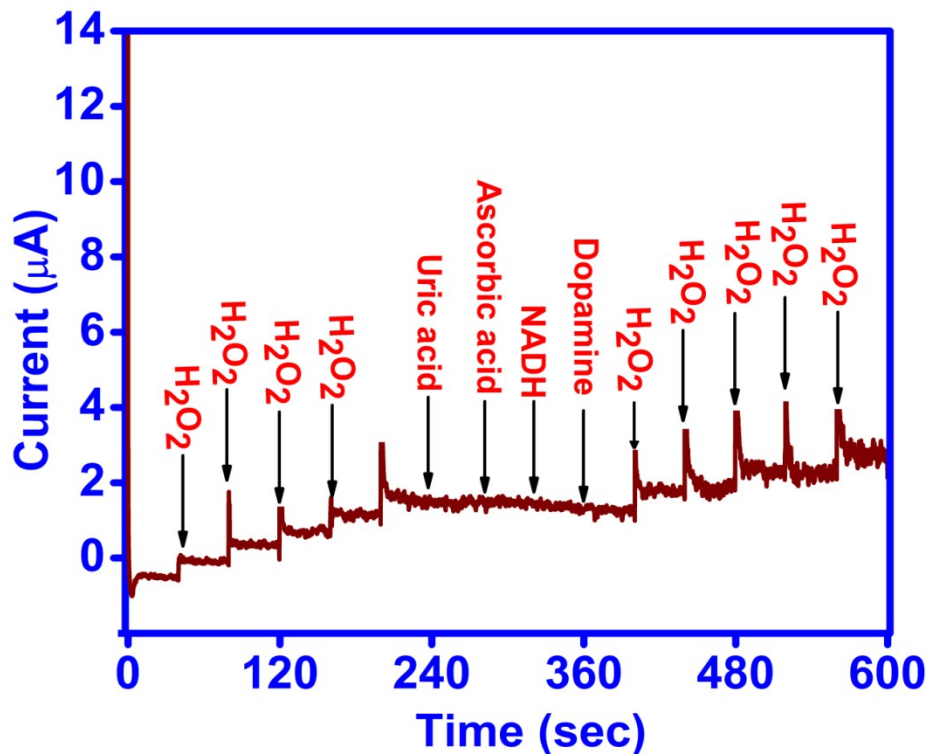

**Fig.S2.** Chronoamperometric response of H<sub>2</sub>O<sub>2</sub> with various interferences such as uric acid, ascorbic acid, NADH, dopamine.

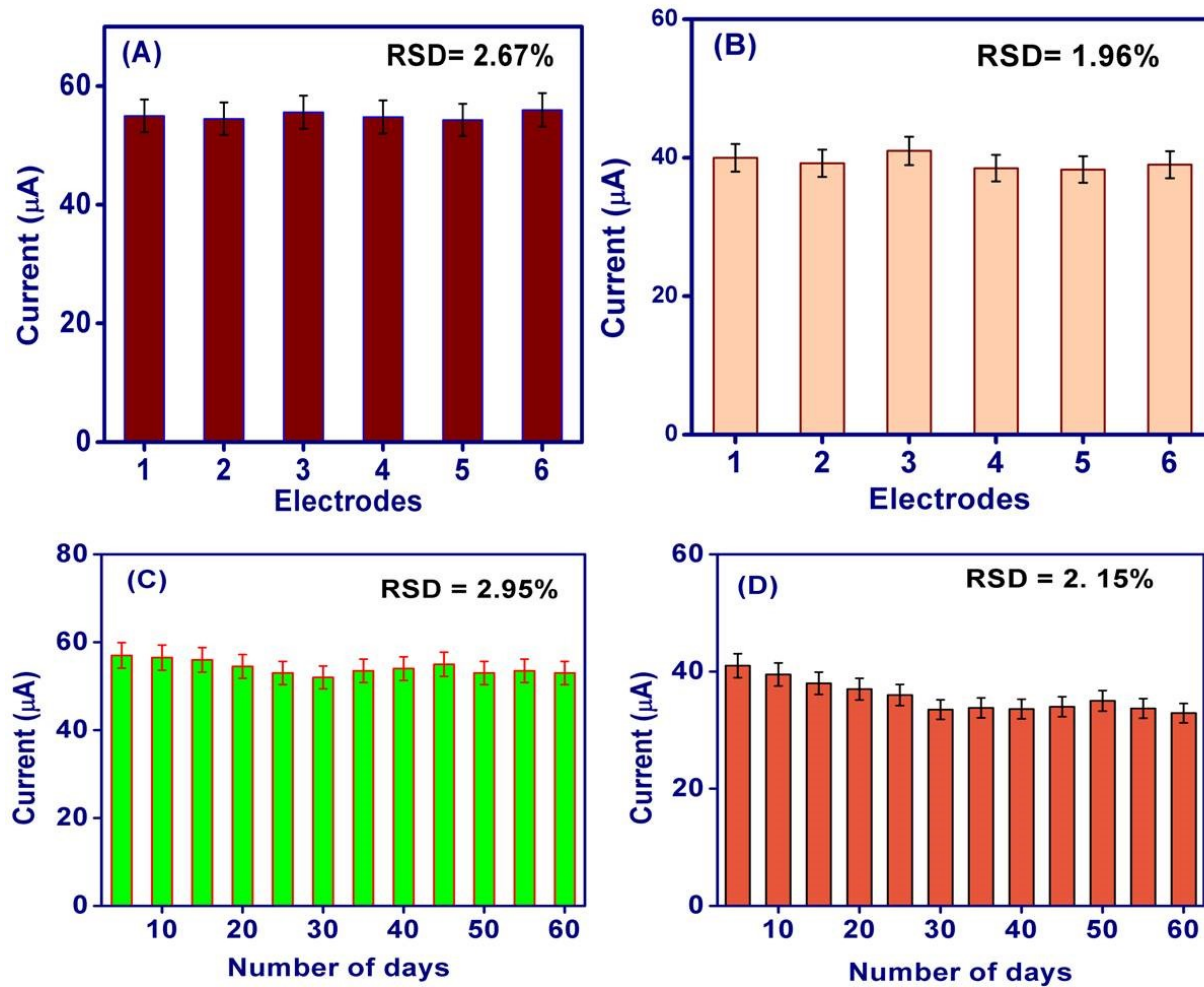

**Fig.S3. Study of reproducibility (A,B) and stability of PAB electrode in 0.1 M PBS solution containing 50  $\mu\text{M}$  GA and 30  $\mu\text{M}$   $\text{H}_2\text{O}_2$**
